# Supplementary material for: Characterising a potential nearshore nursery ground for the blackchin guitarfish (Glaucostegus cemiculus) in Ma’agan Michael, Israel
Source: Frontiers journal article supplement (doi:10.3389/fmars.2024.1391752), 2024-06-18
Supplement: Data_Sheet_1.docx [file Data_Sheet_1.docx]

Supplementary Material

# Supplementary Data

A

B

C

Figure 1. Beach seine net deployment on a typical field survey. A: deployment from the shore into 1.5 m depth. B: closing the net and surrounding the guitarfish in that area. C: Removing captured guitarfish from the net and transferring them into a container filled with seawater. All photos credited to Hagai Nativ, Morris Kahn Marine Research Station.

A

B

C

D

E

Figure 2. Specimen handling protocol. A: morphometric measurements are taken with a measuring tape to the nearest mm. B: a DNA sample is taken in the form of a fin clip. C: a PIT tag is inserted; D: a PIT tag reader scans the tagged guitarfish for the individual serial number. E: Standard observation time to ensure guitarfish wellbeing before releasing them back to the area where they were captured. All photos credited to Hagai Nativ, Morris Kahn Marine Research Station.

### 2.4.1 Sample preparation

Tissue samples in the form of fin clips were collected and preserved in 70% ethanol through the study. Tissue samples were subdivided into smaller, more easily digested fragments, and DNA was extracted using the Promega Wizard® Genomic DNA Purification Kit. DNA concentrations and protein levels were analysed with a Nanodrop 2000 c Spectrophotometer (Thermo Scientific) and stored at −20 °C until required. DNA segments were amplified by polymerase chain reaction (PCR) with the following PCR protocol: The 50-μL PCR mixes included 25 μL of PCR-ready mix GoTaq, 18 μL of ultrapure water, 2 μL of each primer (0.1 mm), 2 μL of BSA and 1 μL of DNA template. The thermal regime consisted of an initial step of 45 s at 95 °C followed by:

•35 cycles of 15 s denaturation at 95 °C,

•15 s annealing at 57 °C,

•45 s extension at 72 °C,

•followed by a final extension of 2 min at 72 °C, then lowered to 4 °C.

PCR products were cleaned using Promega Wizard® SV Gel and PCR Clean-Up System kit, measured for concentrations, and sent for sequencing to Macrogen Inc. Europe. For the COI markers, the ~650 bp segment was amplified by PCR using the FISH1 primer as described in Ward 2005: FishF1- 5' TCAACCAAC CACAAAGACATTGGCAC3' FishR1-5' TAGACTTCTGGGTGGCCAAAGAATCA 3'. For the NADH-2 marker, the ~1044b segment was amplified by PCR using the ILEM and ASNM primer according to Naylor et al. (2005): ILEM: 5’ AAGGAGCAGTTTGATAGAGT 3’ ASNM: 5’ AACGCTTAGCTGTTAATTAA 3’.

### 2.4.2 Genetic data analyses

FroSequences were converted to FASTA format, aligned in BioEdit using the ClustalW algorithm, and trimmed. For CO1, three samples were excluded from the results due to low detection rates and bad readings. For NADH2, one sample was excluded from the results due to a low detection rate, resulting in anomalous readings.

All existing COI and NADH sequences of both families were downloaded from NCBI and BOLD databases, totalling 153 sequences for COI and 52 sequences for NADH. For the phylogenetic analysis, one sequence was chosen for each species depending on length and greatest similarity to the other sequences. On occasions where sequences of the same species did not show similarity, more than one sequence was left for a single species. That was the case for *R. punchier* and *R. rhinobatos* in the COI segment. Two phylogenetic trees were inferred based on the two markers: CO1 and NADH (Supplementary Information, Figure 3). The evolutionary history was described using the Maximum Likelihood method and General Time Reversible model for CO1 and Tamura-Nei model (Tamura & Nei, 1993) for NADH. At the end of this research and publication of the results, the sequences will be uploaded to both BOLD and NCBI databases.

### 2.4.2 Genetic data analyses

FroSequences were converted to FASTA format, aligned in BioEdit using the ClustalW algorithm, and trimmed.

All existing COI and NADH sequences of both families were downloaded from NCBI and BOLD databases, totalling 153 sequences for COI and 52 sequences for NADH. For the phylogenetic analysis, one sequence was chosen for each species depending on length and greatest similarity to the other sequences. On occasions where sequences of the same species did not show similarity, more than one sequence was left for a single species. That was the case for *R. punchier* and *R. rhinobatos* in the COI segment.

A

B

Figure 3. Phylogenetic tree of NADH (A) and CO1 markers (B). The percentage of trees in which the associated taxa are clustered together is shown next to the branches. Initial tree(s) for the heuristic search were obtained automatically by applying Neighbor-Join and BioNJ algorithms to a matrix of pairwise distances that were estimated using the Maximum Composite Likelihood (MCL) approach. Then, the software selected the topology with a superior log likelihood value. The tree is drawn to scale, with branch lengths measured in the number of substitutions per site. This analysis involved 38 nucleotide sequences for NADH and 37 nucleotides for CO1. Evolutionary analyses were conducted in MEGA X (Kumar et al., 2018).

Table 1. Capture and recapture data from specimens caught in Ma’agan Michael between 2017 and 2019.

| Capture | Recapture | Interval (days) | Sex | Size  at capture (cm) | Size at recapture (cm) | Growth (mm/d) |
| --- | --- | --- | --- | --- | --- | --- |
| 07/08/17 | 21/05/18 | 287 | M | 41.4 | 50.8 | 0.33 |
| 02/10/17 | 22/10/17 | 20 | F | 32.9 | 33.7 | 0.40 |
| 16/04/18 | 21/05/18 | 35 | F | 34.6 | 35.9 | 0.37 |
| 27/05/18 | 05/09/18 | 101 | F | 40.2 | 56.9 | 1.65 |
| 22/08/18 | 08/10/18 | 47 | F | 33.8 | 34.5 | 0.15 |
| 22/08/18 | 08/10/18 | 47 | F | 33.3 | 34.7 | 0.30 |
| 04/10/18 | 08/10/18 | 4 | F | 31.6 | 31.6 | 0.00 |
| 04/10/18 | 29/10/18 | 25 | F | 34.9 | 34.8 | -0.04 |
| 23/10/19 | 14/11/19 | 22 | M | 34.6 | 35.1 | 0.23 |


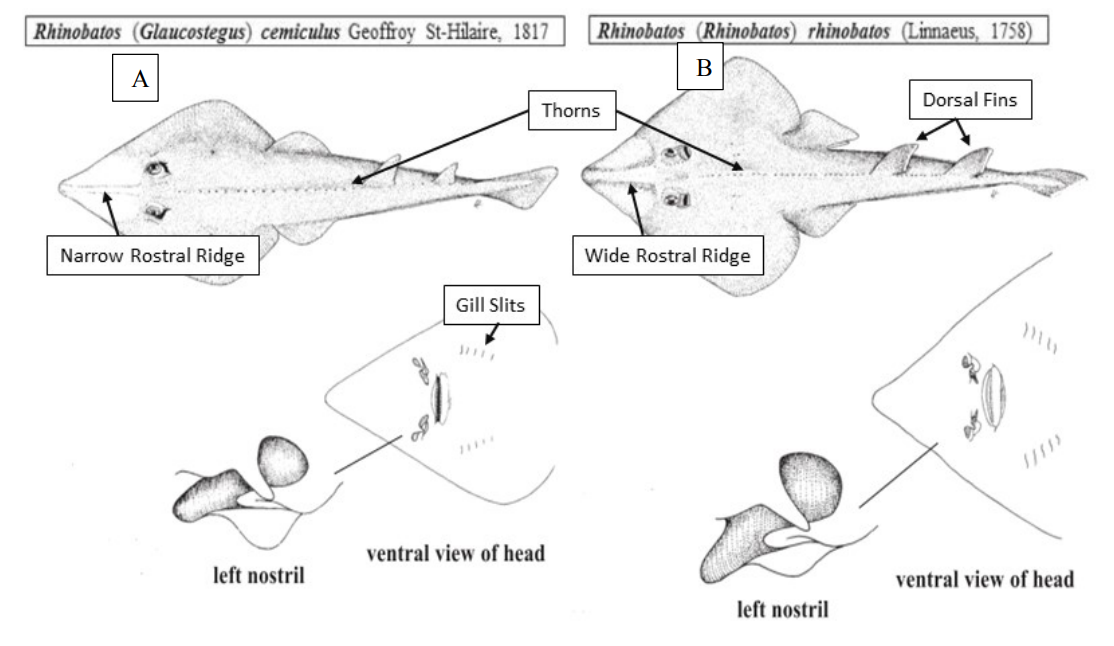


Figure 4. Dorsal and ventral view of A: *Glaucostegus cemiculus* and B: *Rhinobatos rhinobatos*. (Modified from Serena, 2005).

A

B

Figure 5 a,b. Morphological differences between *R. rhinobatos* and *G. cemiculus*. A - dorsal view of both species. On the left is the widely separated rostral ridge of *R. rhinobatos*; on the right is the narrowly separated rostral ridge of *G. cemiculus*. B – a ventral view of both species; on the bottom are the nasal lobes separated of *R. rhinobatos*, and at the top, the nasal lobes that are elongated of *G. cemiculus*. All photos credited to Barak Azrieli.
